# Supplementary material
Source: PubMed Central journal article supplement (PMC10068860)
Supplement: EIJ-D-22-00677_Allali_SD.pdf [file EIJ-D-22-00677_Allali_SD.pdf]

## Supplementary data

**Supplementary Table 1. Cumulative incidence of cardiovascular events at 2 years.**

|                           | MB   | RA   | HR   | 95%CI      | P log-rank |
|---------------------------|------|------|------|------------|------------|
| TVF*                      | 11%  | 9%   | 1.23 | 0.51-2.96  | 0.648      |
| MACE**                    | 18%  | 16%  | 1.13 | 0.58-2.22  | 0.722      |
| All cause death           | 8%   | 7%   | 1.13 | 0.41-3.31  | 0.807      |
| Cardiovascular death      | 5.1% | 4.1% | 1.24 | 0.33-4.62  | 0.747      |
| MI                        | 5%   | 4%   | 1.25 | 0.34-4.67  | 0.735      |
| Target vessel-related MI  | 1%   | 2%   | 0.49 | 0.05-5.48  | 0.559      |
| TVR                       | 9%   | 5%   | 1.85 | 0.62-5.51  | 0.265      |
| Clinically driven TVR     | 5%   | 4%   | 1.28 | 0.34-4.76  | 0.713      |
| TLR                       | 8%   | 2%   | 4.1  | 0.87-19.25 | 0.053      |
| Clinically driven TLR     | 4%   | 1%   | 4.1  | 0.45-36.38 | 0.174      |
| Non TVR                   | 12%  | 5%   | 2.49 | 0.88-7.08  | 0.075      |
| Clinically driven non TVR | 9%   | 5%   | 1.85 | 0.62-5.52  | 0.262      |
| Stroke                    | 3%   | 2%   | 1.34 | 0.30-5.98  | 0.701      |

MACE=major adverse cardiac events; MI=myocardial infarction; TLR=target lesion revascularization; TVF=target vessel failure; TVR=target vessel revascularization.

\*defined as as the composite of cardiac death, target vessel-related myocardial infarction (MI), and clinically driven target vessel revascularization (TVR)

\*\*defined as the composite of all cause death, MI and TVR

**Supplementary Table 2. Uni- and multivariate regression analysis for predictors of 2-year target vessel failure.**

| Variable                   | HR (95% CI) |                  | P value | HR (95% CI) |                | P value |
|----------------------------|-------------|------------------|---------|-------------|----------------|---------|
| Age                        | 1.01        | (0.947 – 1.074)  | 0.789   | -           |                |         |
| Female sex                 | 1.36        | (0.524 – 3.547)  | 0.526   | -           |                |         |
| Hypertension               | 1.83        | (0.759 – 4.419)  | 0.178   | -           |                |         |
| Diabetes mellitus          | 2.95        | (0.865 – 10.073) | 0.084   | 3.67        | (1.04 – 12.85) | 0.043   |
| Dyslipidemia               | 1.83        | (0.759 – 4.419)  | 0.178   | -           |                |         |
| Smoking (current)          | 2.34        | (0.676 – 8.071)  | 0.180   | 2.13        | (0.61 – 7.38)  | 0.235   |
| CKD                        | 2.19        | (0.677 – 12.583) | 0.151   | 2.74        | (0.64 – 11.85) | 0.175   |
| EF (continuous)            | 0.978       | (0.943 – 1.014)  | 0.222   | -           |                |         |
| EF <50 (categorical)       | 0.861       | (0.252 – 2.940)  | 0.812   | -           |                |         |
| Severe calcification       | 1.37        | (0.457 – 4.086)  | 0.577   | -           |                |         |
| Ostial lesion              | 1.17        | (0.426 – 3.227)  | 0.758   | -           |                |         |
| Bifurcation lesion         | 0.488       | (0.177 – 1.343)  | 0.165   | 0.51        | (0.18 – 1.42)  | 0.200   |
| Lesion length              | 1.018       | (0.991 – 1.045)  | 0.193   | 1.02        | (0.99 – 1.05)  | 0.176   |
| Lesion length $\geq$ 27 mm | 1.622       | (0.663 – 3.967)  | 0.290   | -           |                |         |
| Stent expansion < 80       | 1.576       | (0.434 – 5.725)  | 0.490   | -           |                |         |

CKD= chronic kidney disease; EF= ejection fraction

**Supplementary Table 3. Uni- and multivariate regression analysis for predictors of 2-year target lesion revascularisation.**

| Variable                  | HR (95% CI) |                | P value | HR (95% CI) |             | P value |
|---------------------------|-------------|----------------|---------|-------------|-------------|---------|
| Age                       | 1.00        | (0.916-1.092)  | 0.995   | -           |             |         |
| Female sex                | 0.790       | (0.168-3.719)  | 0.765   | -           |             |         |
| Hypertension              | 1.079       | (0.279-4.171)  | 0.913   | -           |             |         |
| Diabetes mellitus         | 1.345       | (0.380-4.766)  | 0.646   | -           |             |         |
| Dyslipidemia              | 1.079       | (0.279-4.171)  | 0.913   | -           |             |         |
| Smoking (current)         | 0.876       | (0.177-4.342)  | 0.871   | -           |             |         |
| CKD                       | 0.796       | (0.169-3.751)  | 0.773   | -           |             |         |
| EF (continuous)           | 1.025       | (0.957-1.097)  | 0.481   | -           |             |         |
| Severe calcification      | 3.142       | (0.398-24.797) | 0.277   | -           |             |         |
| Ostial lesion             | 2.330       | (0.657-8.256)  | 0.190   | 11.3        | (2.26-56.8) | 0.003   |
| Bifurcation lesion        | 0.165       | (0.021-1.301)  | 0.087   | 0.09        | (0.01-0.79) | 0.030   |
| Lesion length             | 1.042       | (1.008-1.077)  | 0.016   | 1.06        | (1.02-1.09) | 0.003   |
| Lesion length $\geq$ 27mm | 4.357       | (0.925-20.518) | 0.063   | -           |             |         |
| Stent expansion < 80      | 1.826       | (0.204-16.336) | 0.590   | -           |             |         |

CKD= chronic kidney disease; EF= ejection fraction

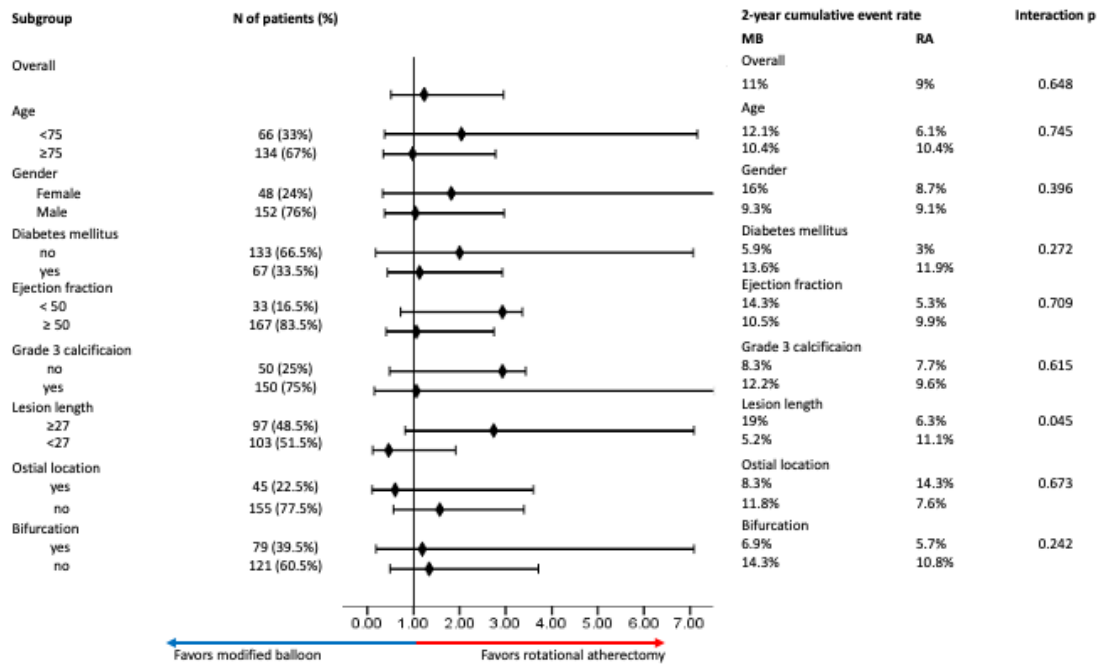

**Supplementary Figure 1.** Subgroup analysis of TVF.

MB: modified balloon; RA: rotational atherectomy; TLR: target lesion revascularisation; TVF: target vessel failure.
